# Supplementary material
Source: PubMed Central journal article supplement (PMC2442826)
Supplement: NIHMS49555-supplement-1.pdf [file NIHMS49555-supplement-1.pdf]

## Supporting Information

for

### **Cytotoxic Triterpenoid Saponins from *Albizia gummifera* from the Madagascar Rain Forest**

Shugeng Cao, Andrew Norris, James S. Miller, Fidy Ratovoson, Jeremi Razafitsalama, Rabodo Andriantsiferana, Vincent E.

Rasamison, and David G. I. Kingston

*Department of Chemistry, M/C 0212, Virginia Polytechnic Institute and State University, Blacksburg, Virginia 24061, Missouri Botanical Garden, P. O. Box 299, St. Louis, Missouri 63166-029 and B.P 3391, Antananarivo, Madagascar, and Centre National d'Application des Recherches Pharmaceutiques, B. P. 702, Antananarivo 101, Madagascar*

<sup>1</sup>H NMR spectra of compounds **1 - 3**

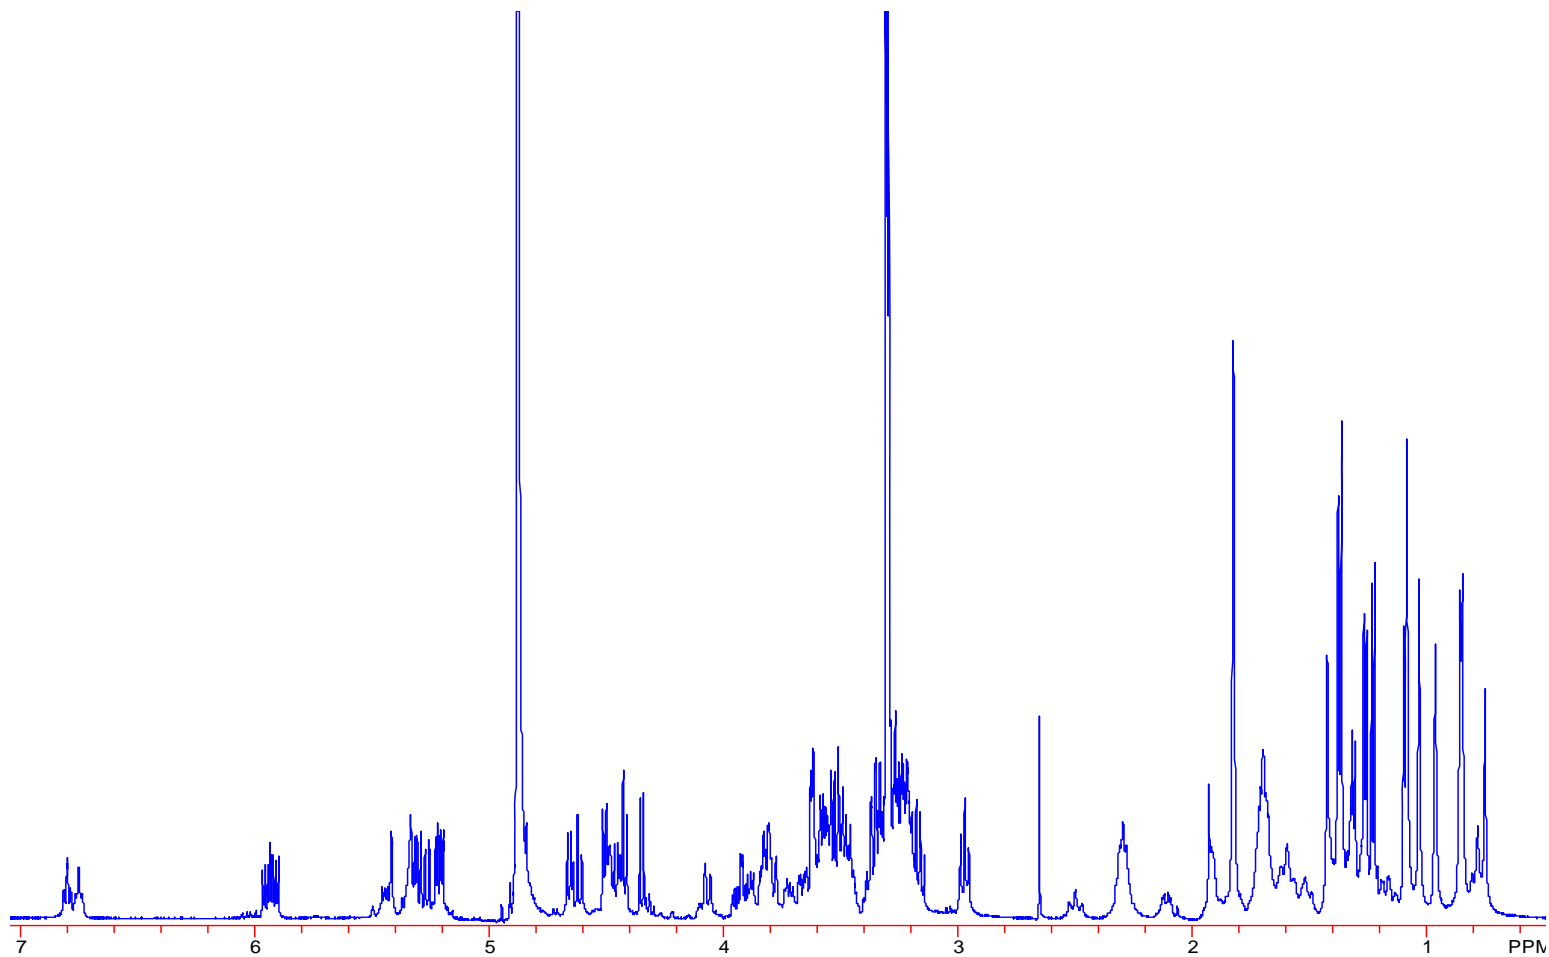

$^1\text{H}$  NMR spectrum of compound 1 in  $\text{CD}_3\text{OD}$

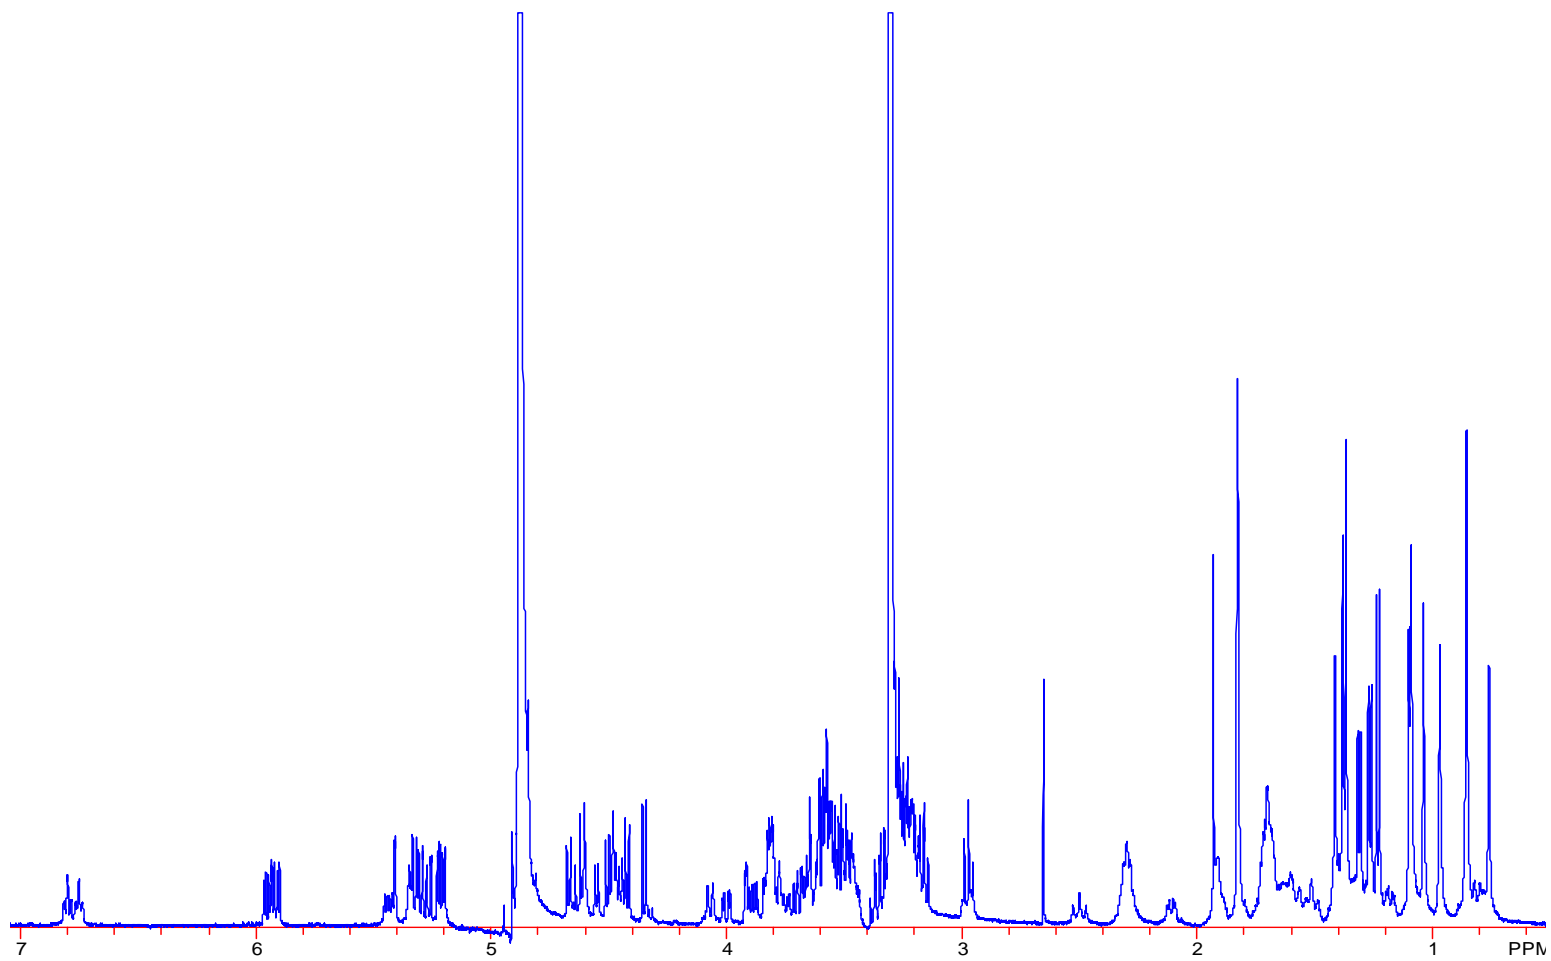

$^1\text{H}$  NMR spectrum of compound 2 in  $\text{CD}_3\text{OD}$

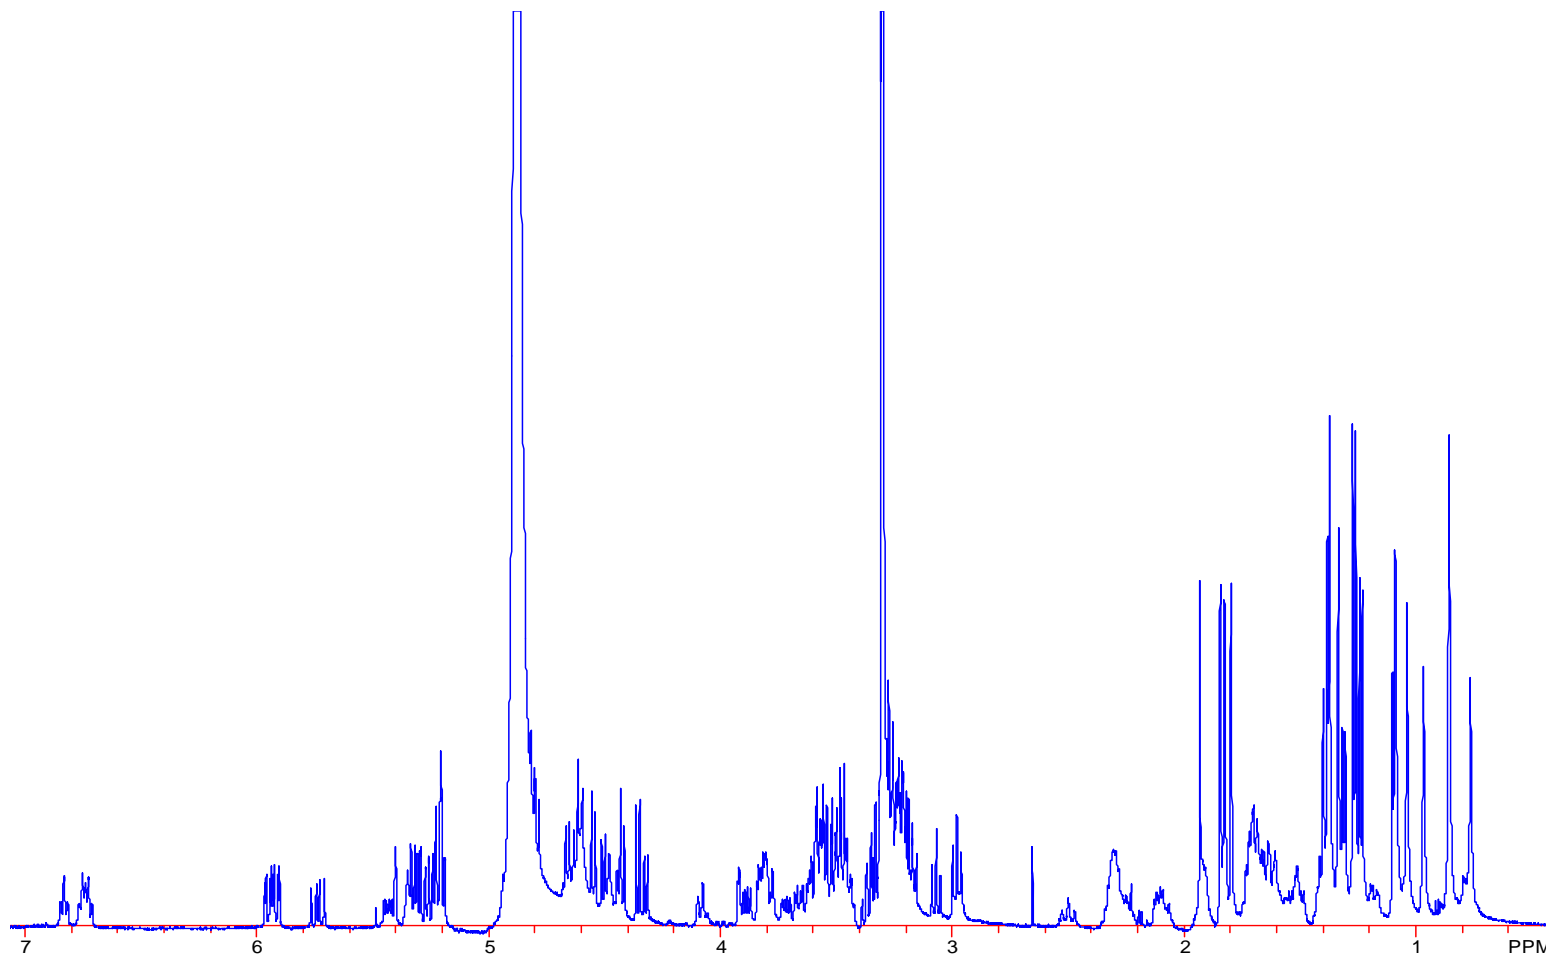

$^1\text{H}$  NMR spectrum of compound 3 in  $\text{CD}_3\text{OD}$
